# Supplementary material for: Facile synthesis of porous C-doped C3N4: fast charge separation and enhanced photocatalytic hydrogen evolution
Source: Royal Society of Chemistry journal article supplement (doi:10.1039/d0nj04169f), 2020-01-01
Supplement: d0nj04169f1.pdf [file d0nj04169f1.pdf]

## Supporting Information

### Facile Synthesis of Porous C-Doped $g\text{-C}_3\text{N}_4$ : Fast Charge Separation and Enhanced Photocatalytic Hydrogen Evolution

Yabin Jiang,<sup>a</sup> Zhuogeng Lin,<sup>a</sup> Yuying Zhang,<sup>a</sup> Yuecheng Lai,<sup>a</sup> Dong Liang,<sup>a</sup> Chunzhen Yang,<sup>a\*</sup>

<sup>a</sup> School of Materials, Sun Yat-sen University, Guangzhou, 510006, China

Corresponds to [yangchzh6@mail.sysu.edu.cn](mailto:yangchzh6@mail.sysu.edu.cn)

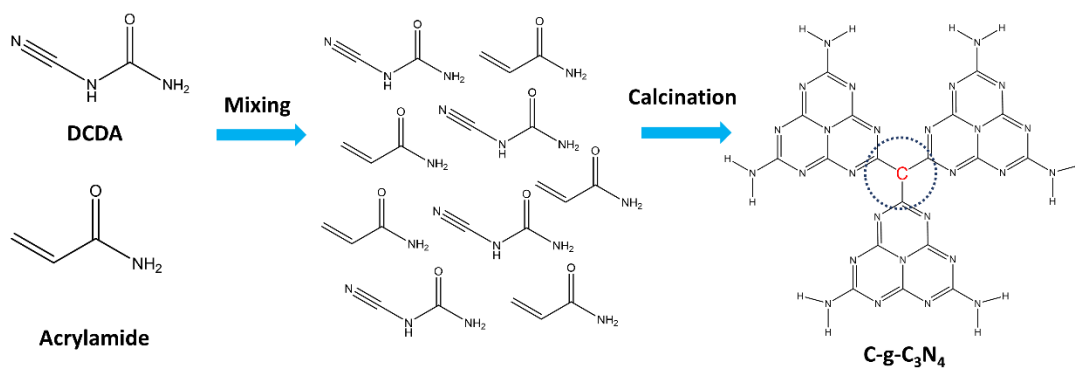

**Fig. S1.** The possible polymerization process to generate C- $g\text{-C}_3\text{N}_4$ .

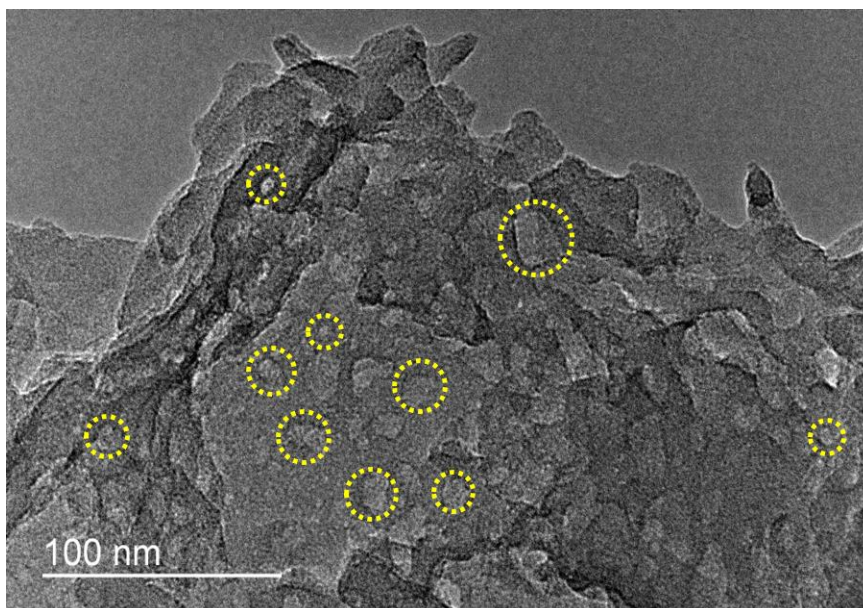

**Fig. S2.** The enlarged TEM images of CDCN-20.  
From the enlarged TEM images, we can surely observe that CDCN-20 show porous and thinner nanosheet structure by adding the acrylamide as gas bubble.

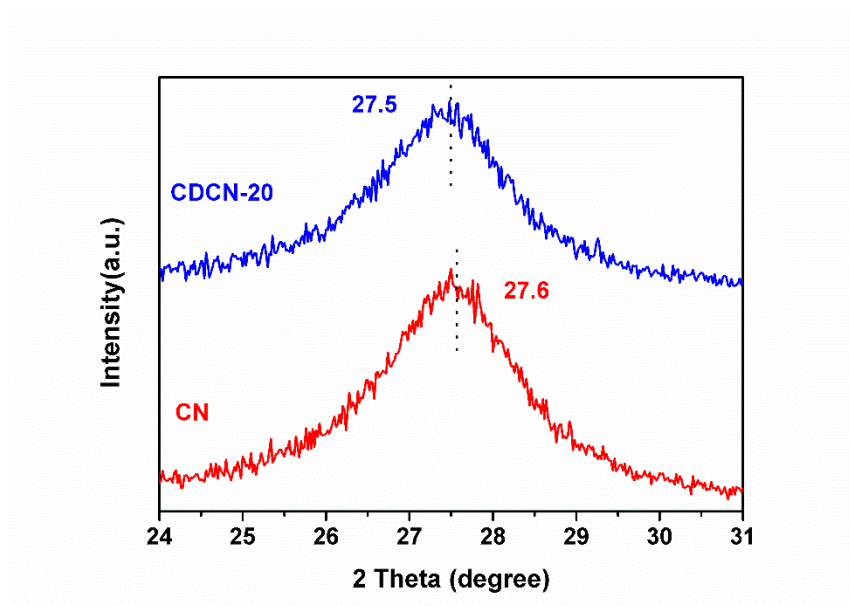

**Fig. S3.** The (0 0 2) peak of XRD patterns of CN and CDCN-20.

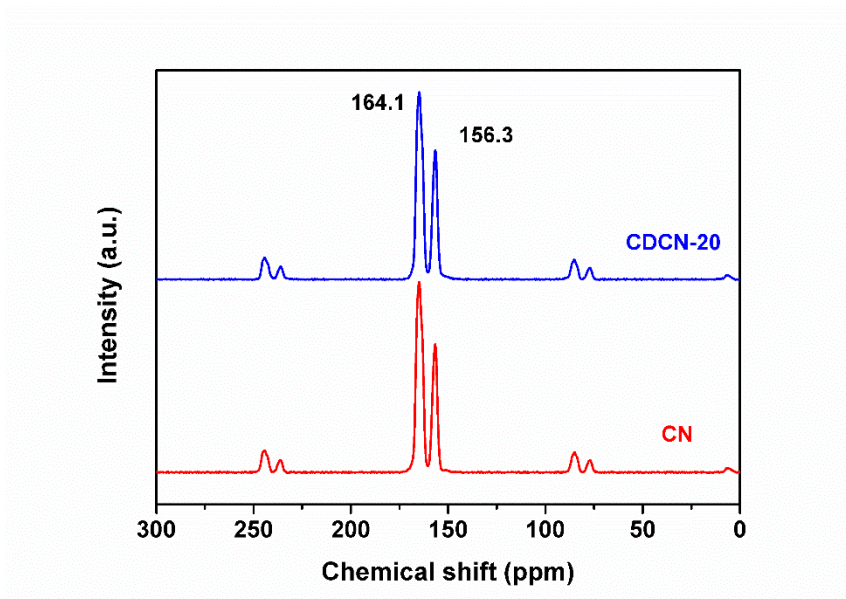

**Fig. S4.** The solid state  $^{13}\text{C}$  CP MAS NMR spectra of CN and CDCN-20.

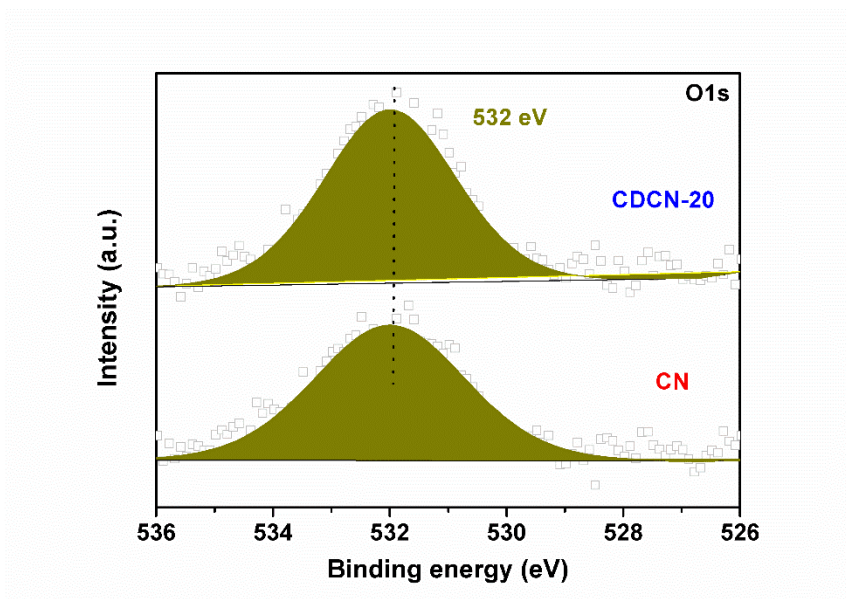

**Fig. S5.** High-resolution XPS spectra of O1s of CN and CDCN-20.

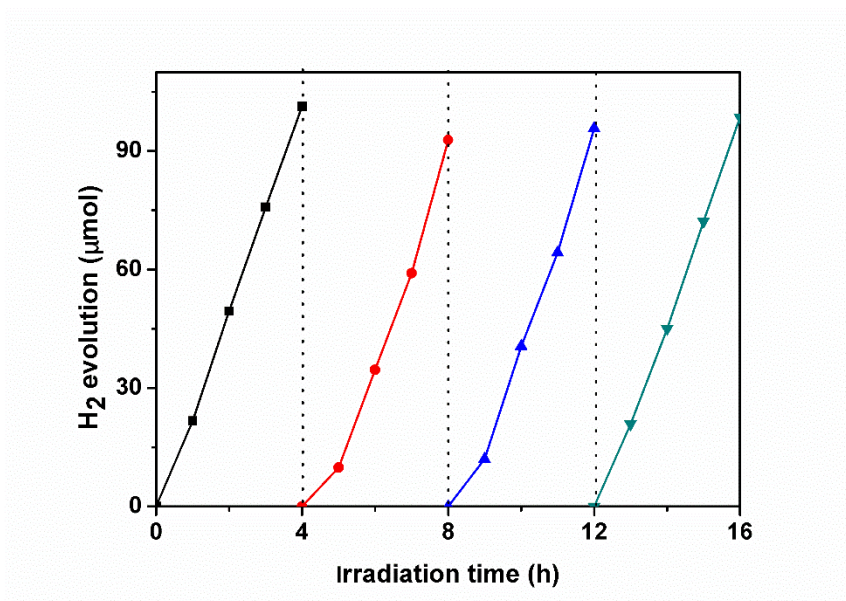

Fig. S6. long-term H<sub>2</sub> evolution by CDCN-20 under visible light irradiation.

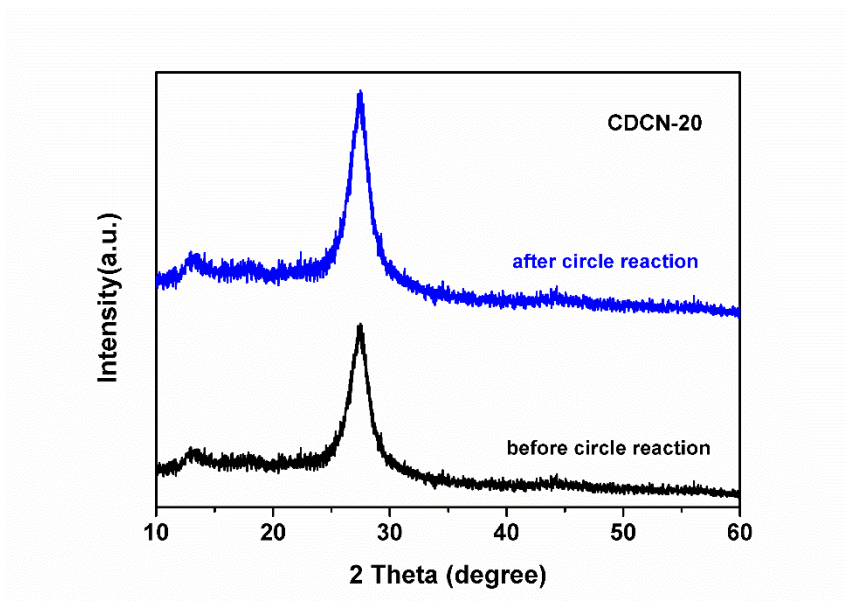

Fig. S7. XRD patterns of CDCN-20 before and after circle reaction.

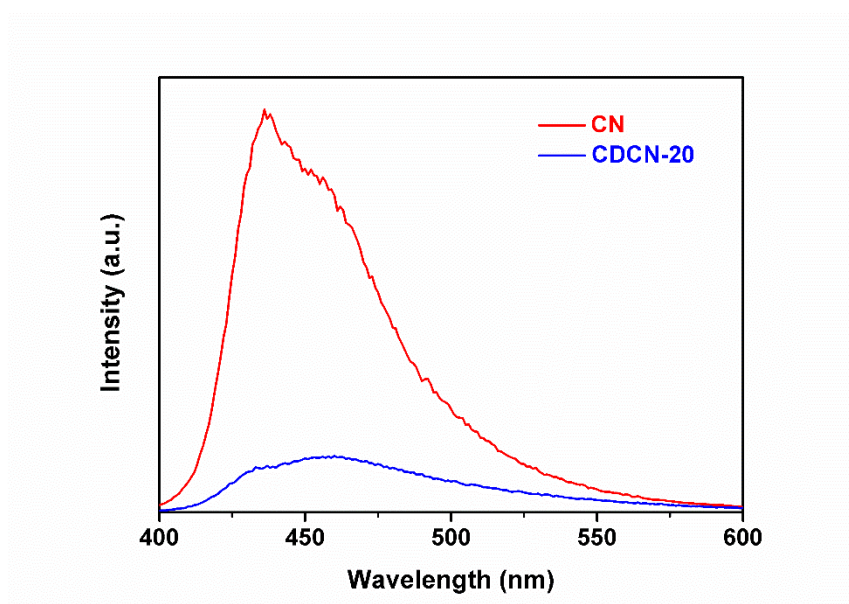

**Fig. S8.** Photoluminescence spectra of CN and CDCN-20.

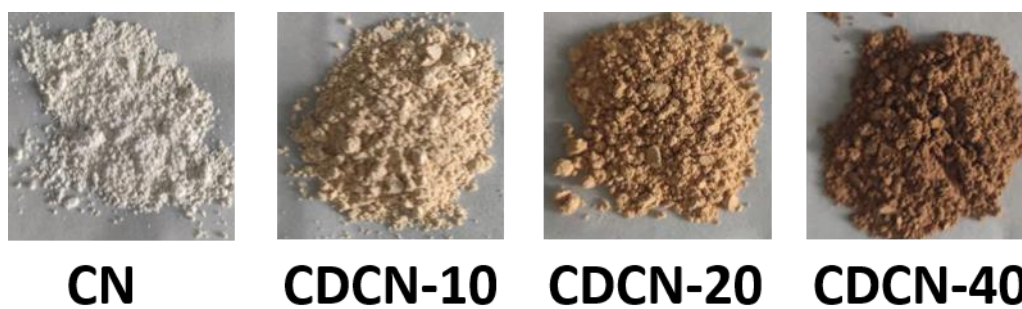

**Fig. S9.** The color variation of the g-C<sub>3</sub>N<sub>4</sub> based material. Adding trace amount of acrylamide can cause the change of the product color from light yellow to dark brown.

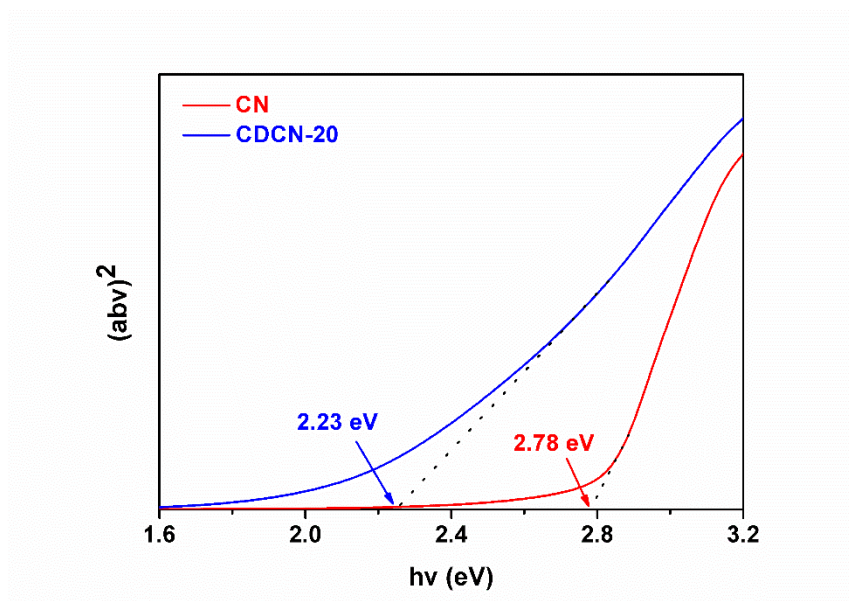

**Fig. S10.** Band energy level of CN and CDCN-20.

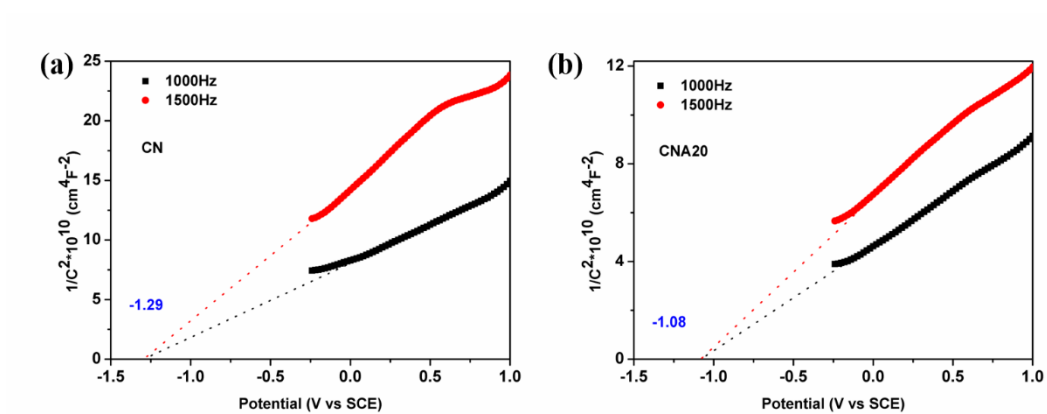

**Fig. S11.** Mott-Schottky plots of CN (a) and CDCN-20 (b) under different frequency 1000 Hz and 1500 Hz.

**Table S1** Results of organic elemental analyses for CN and CDCN-x (x=10, 20 and 40).

| sample  | N/%   | C/%   | H/%   | C/N <sup>a</sup> |
|---------|-------|-------|-------|------------------|
| CN      | 58.03 | 33.21 | 2.381 | 0.6677           |
| CDCN-10 | 58.73 | 34.11 | 2.39  | 0.6776           |
| CDCN-20 | 58.12 | 33.8  | 2.233 | 0.6785           |
| CDCN-40 | 54.67 | 34.72 | 2.58  | 0.7409           |

a: mola radio

**Table S2** Area ratios of the C and N atoms in different chemical states of CN and CNA20 samples.

| Sample  | C1s          |        |            | N1s          |                  |            |
|---------|--------------|--------|------------|--------------|------------------|------------|
|         | Position(ev) | Assign | Ratio(at%) | Position(ev) | Assign           | Ratio(at%) |
| CN      | 284.8        | C-C    | 10.9       | 398.8        | C-N=C            | 75.9       |
|         | 288.1        | N=C-N  | 89.1       | 400.1        | N-C <sub>3</sub> | 24.1       |
|         |              |        |            | 401.1        | C-N-H            |            |
| CDCN-20 | 284.8        | C-C    | 15.6       | 398.8        | C-N=C            | 76.8       |
|         | 288.1        | N=C-N  | 84.4       | 400.1        | N-C <sub>3</sub> | 23.2       |
|         |              |        |            | 401.1        | C-N-H            |            |

**Table S3** Comparison of the photocatalytic performance and synthetic approach of CDCN-20 with other C-doped photocatalysts reported recently in the literature.

| Photocatalyst                                   | Precursor                                             | synthesis              | Application               | Enhanced photocatalytic activity/pristine | Ref.      |
|-------------------------------------------------|-------------------------------------------------------|------------------------|---------------------------|-------------------------------------------|-----------|
| CDCN-20                                         | Dicyandiamide<br>Acrylamide                           | Thermal polymerization | H <sub>2</sub> evolution  | 3.4 times                                 | This work |
| C-g-C <sub>3</sub> N <sub>4</sub>               | Melamine pretreated with absolute ethanol             | Polycondensation       | RhB degradation           | 4.47 times                                | [1]       |
| 5M-CF                                           | Melamine and melamine porous resin foam               | Polycondensation       | NO removal                | 3.8 times                                 | [2]       |
| CCN                                             | Glucose<br>Melamine                                   | Hydrothermal           | 4-nitrophenol degradation | Enhanced                                  | [3]       |
| C <sub>2</sub> /g-C <sub>3</sub> N <sub>4</sub> | g-C <sub>3</sub> N <sub>4</sub><br>Glucose            | Hydrothermal           | MB degradation            | 1.32 times                                | [4]       |
| C <sub>2</sub> GCN                              | Dicyandiamide<br>β-cyclodextrin                       | Thermal polymerization | H <sub>2</sub> evolution  | 5 times                                   | [5]       |
| C-g-C <sub>3</sub> N <sub>4</sub>               | Melamine and cyanuric acid were dissolved in ethylene | Annealing              | H <sub>2</sub> evolution  | 15 times                                  | [6]       |
| CCN-0.2                                         | Melamine<br>cyanuric acid<br>Chitosan                 | Thermal polymerization | H <sub>2</sub> evolution  | 29.1 times                                | [7]       |
| BTPMC g-C <sub>3</sub> N <sub>4</sub>           | Urea<br>Kapok fibre                                   | Thermal condensation   | BPA Degradation           | Enhanced                                  | [8]       |
| CN-C                                            | Urea<br>Saccharose                                    | Co-pyrolysis           | NO removal                | 1.7 times                                 | [9]       |



## References:

- [1] G. Dong, K. Zhao, L. Zhang. *Chem. Commun.*, 2012, **48**, 6178-6180
- [2] Z. Zhao, Y. Sun, F. Dong, Y. Zhang, H. Zhao. *RSC Adv.*, 2015, 5, 39549-39556
- [3] P. Zhang, X. Li, C. Shao, Y. Liu. *J. Mater. Chem. A.*, 2015, 3, 3281-3284
- [4] Y. Li, S. Wu, L. Huang, J. Wang, H. Xu, H. Li. *Mater. Lett.*, 2014, 137, 281-284.
- [5] E. S. Dasilva, N. M. M. Moura, A. Coutinho, G. Draai, B. M. S. Teixeira, N. A. Sobolev, C. G. Silva, M. G. M. S. Neves, M. Prieto, J. L. Faria. *ChemSusChem*, 2018, **11**, 2681-2694.
- [6] F. Su, C. Xu, Y. Yu, W. Zhang. *ChemCatChem*.2016, **8**, 3527-3535.
- [7] G. Liu, M. Xue, Q. Liu, H. Yang and Y. Zhou, *J. Colloid Interface Sci.*, 2019, **552**, 728-734.
- [8] M. A. Mohamed, M. F. M. Zain, L. Jeffery Minggu, M. B. Kassim, N. A. Saidina Amin, W. N. W. Salleh, M. N. I. Salehmin, M. F. Md Nasir and Z. A. Mohd Hir, *Appl. Catal., B*, 2018, **236**, 265-279.
- [9] M. Ran, J. Li, W. Cui, Y. Li, P. Li and F. Dong, *Catal. Sci. Technol.*, 2018, **8**, 3387-3394.
